# Supplementary figures and images for: Human CD4+ T Cell Epitopes from Vaccinia Virus Induced by Vaccination or Infection
Source: PLOS journal article supplement (doi:10.1371/journal.ppat.0030144), 2007-10-09

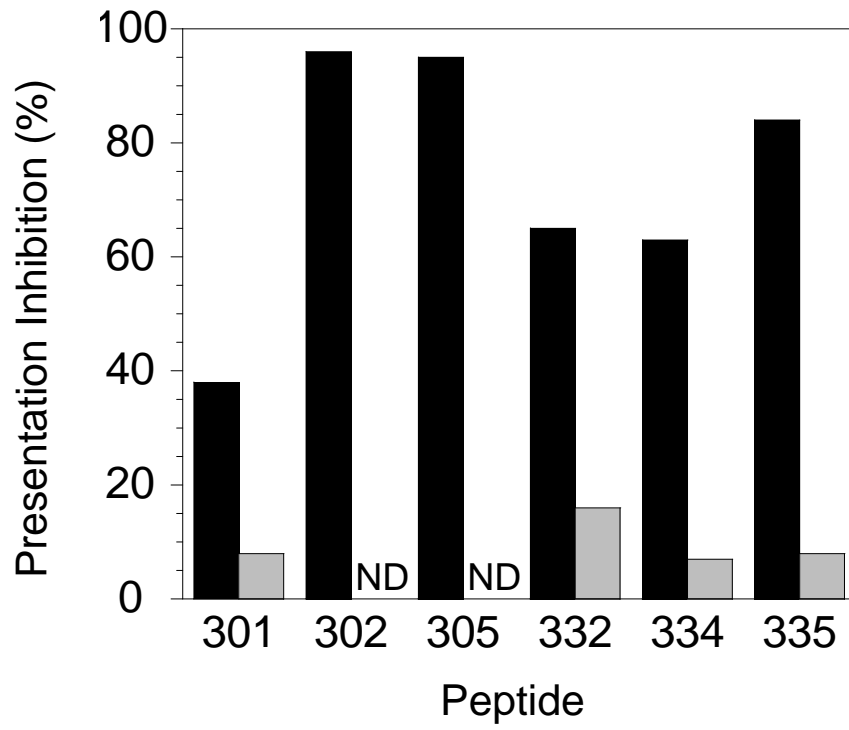

Supplement: S3 (10.1371/journal.ppat.0030144.s003) [file journal.ppat.0030144.s003]
